# Supplementary material for: Atypical phase-change alloy Ga2Te3: atomic structure, incipient nanotectonic nuclei, and multilevel writing
Source: Royal Society of Chemistry journal article supplement (doi:10.1039/d1tc03850h), 2021-01-01
Supplement: d1tc03850h1.pdf [file d1tc03850h1.pdf]

# Atypical phase-change alloy $\text{Ga}_2\text{Te}_3$ : atomic structure, incipient nanotectonic nuclei, multilevel writing

Andrey Tverjanovich, Maxim Khomenko, Chris J. Benmore, Sergei Bereznev, Anton Sokolov, Daniele Fontanari, Aleksei Kiselev, Andrey Lotin and Eugene Bychkov\*

## Electronic supplementary information

**Table S1** Homopolar and heteropolar bond energies in the Ga-Te system

**Rough estimation of optical properties of crystallized and amorphous  $\text{Ga}_2\text{Te}_3$**

**Fig. S1** Schematics of the experimental pump-probe setup

**Fig. S2** Electronic density of states in bulk glassy  $\text{GaTe}_4$  at 300 K

**Fig. S3** Optical RESET–SET transition in  $\text{Ga}_2\text{Te}_3$  PLD film induced by a femtosecond laser

**Fig. S4** Crystal structure of rhombohedral high-pressure HP- $\text{Ga}_2\text{Te}_3$

**Fig. S5** Neutron total correlation functions of rhombohedral and cubic  $\text{Ga}_2\text{Te}_3$

**Structural changes during SET-RESET transitions**

\* Email: bychkov@univ-littoral.fr

## Homopolar and heteropolar bond energies in the Ga-Te system

Table S1 shows the homopolar Ga-Ga/Te-Te, and heteropolar Ga-Te bond energies in the Ga-Te binary system.

**Table S1** Homopolar and heteropolar bond energies in gallium tellurides

| Homopolar bonds | $E_{\text{homo}}$<br>(kJ mol <sup>-1</sup> ) | Heteropolar bonds | $E_{\text{hetero}}$<br>(kJ mol <sup>-1</sup> ) | $\frac{1}{2}(E_{\text{Ga-Ga}}+E_{\text{Te-Te}})$<br>(kJ mol <sup>-1</sup> ) |
|-----------------|----------------------------------------------|-------------------|------------------------------------------------|-----------------------------------------------------------------------------|
| Ga - Ga         | 113                                          | Ga - Te           | 147                                            | 120                                                                         |
| Te - Te         | 126                                          |                   |                                                |                                                                             |

The homopolar bond energies were taken from the following sources.<sup>S1,S2</sup> The heteropolar bond energy was calculated according to Pauling:<sup>S3</sup>

$$X_A - X_B = 0.102\sqrt{E_{A-B} - (E_{A-A} \times E_{B-B})^{0.5}}. \quad (\text{S1})$$

Consequently,

$$E_{A-B} = \sqrt{E_{A-A} \times E_{B-B}} + 96(X_A - X_B)^2, \quad (\text{S2})$$

where  $X_{\text{Ga}} = 1.81$  and  $X_{\text{Te}} = 2.10$  are the Pauling's electronegativities.

### **Rough estimation of optical properties of crystallized and amorphous Ga<sub>2</sub>Te<sub>3</sub>**

The expected changes in relative transmittance and reflectivity were estimated without taking into account both the extinction and the absorption since the optical absorption data for crystallized Ga<sub>2</sub>Te<sub>3</sub> are not measured yet.

Different densities of amorphous ( $\rho_g = 5.22 \text{ g cm}^{-3}$ ) and crystallized ( $\rho_c = 5.64 \text{ g cm}^{-3}$ ) Ga<sub>2</sub>Te<sub>3</sub> lead to different refractive indices  $n_g = 3.13$  (experimental) and  $n_c = 3.67$ , estimated using the Clausius-Mossotti relation:

$$\left(\frac{n_g^2-1}{n_g^2+2}\right)\left(\frac{n_c^2+2}{n_c^2-1}\right) = \frac{\rho_g}{\rho_c}.$$

Different refractive indices  $n_R$  allow a rough estimation of the reflectivity without taking into account the extinction coefficient:

$$R = \frac{(n_R-1)^2}{(n_R+1)^2},$$

and the estimated reflectivity of amorphous Ga<sub>2</sub>Te<sub>3</sub>,  $R_a$ , appears to be lower than that of crystallized Ga<sub>2</sub>Te<sub>3</sub>,  $R_a/R_c \cong 0.81$ . Likewise, the expected transmittivities are also different,  $T_c/T_a \cong 0.92$ .

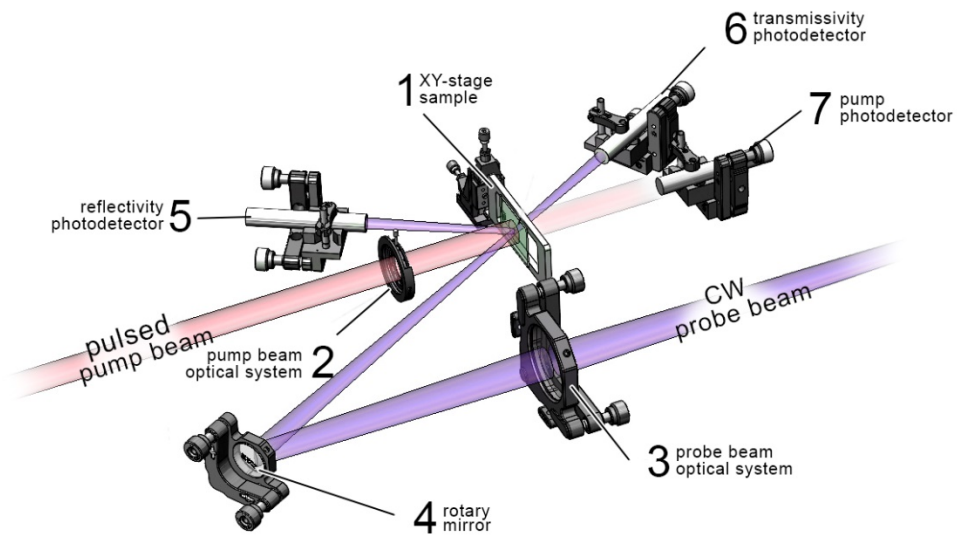

**Fig. S1** Schematics of the experimental pump-probe setup used in preliminary optical phase-change experiments.<sup>S4</sup>

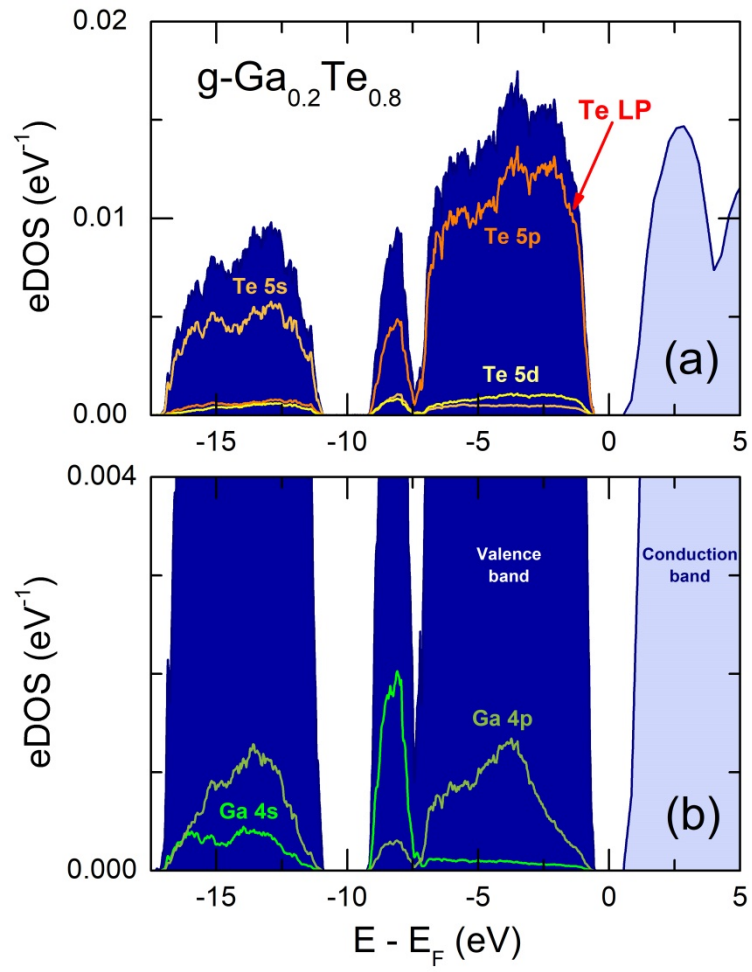

**Fig. S2** Electronic density of states (eDOS) in bulk glassy GaTe<sub>4</sub> ( $x = 0.2$ ) at 300 K and the eDOS projections on (a) tellurium and (b) gallium atomic pseudo-wave functions.<sup>S5</sup> The position of Te nonbonding lone-pair states is shown by the red arrow.

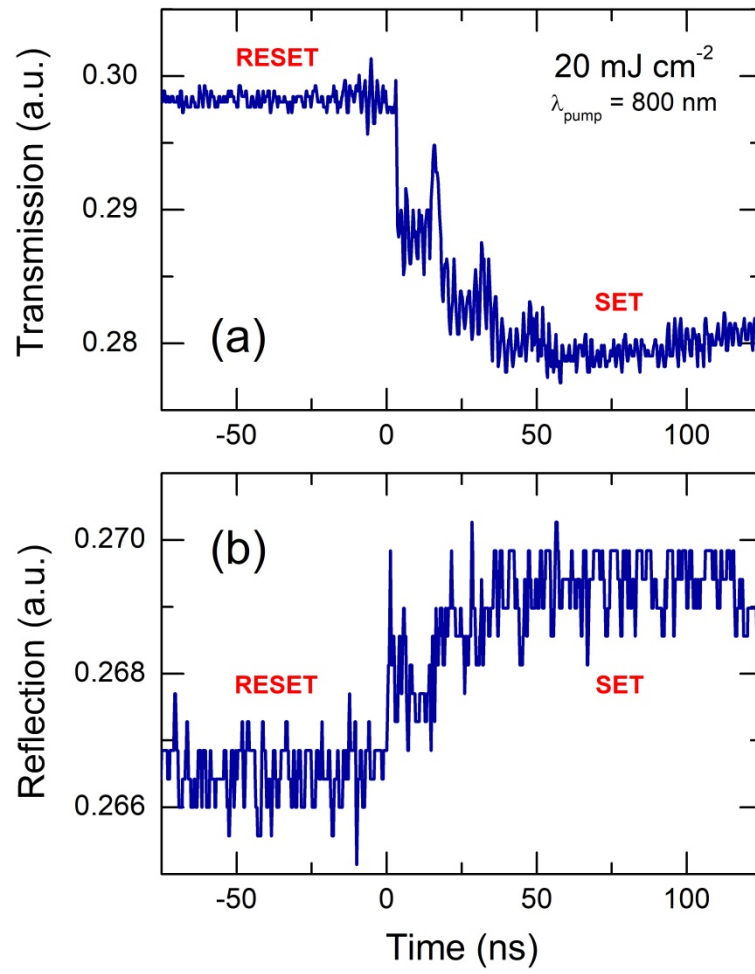

**Fig. S3** Optical RESET–SET transition in Ga<sub>2</sub>Te<sub>3</sub> PLD film (100 nm) induced by a femtosecond laser with  $\lambda_{\text{pump}} = 800 \text{ nm}$  and the energy density  $20 \text{ mJ cm}^{-2}$ : (a) transmission mode, (b) reflection mode.

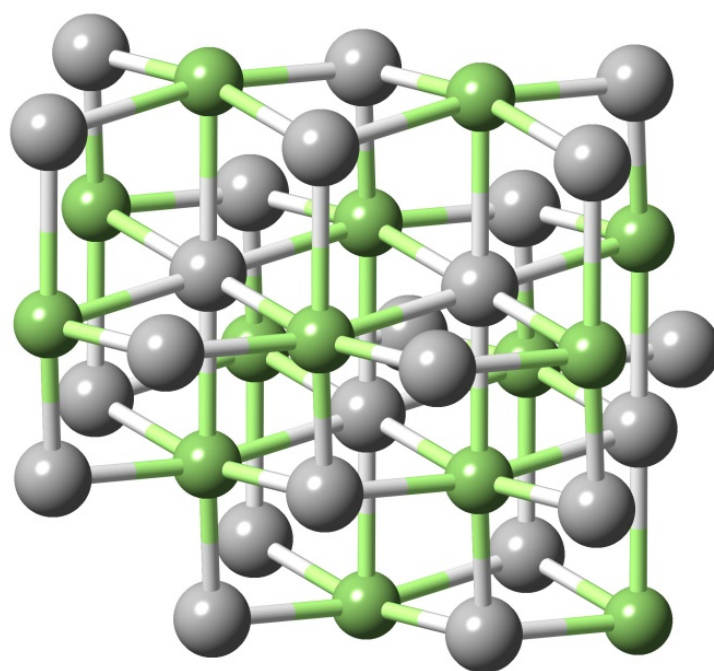

**Fig. S4** Crystal structure of rhombohedral high-pressure HP-Ga<sub>2</sub>Te<sub>3</sub>.<sup>S6</sup>.

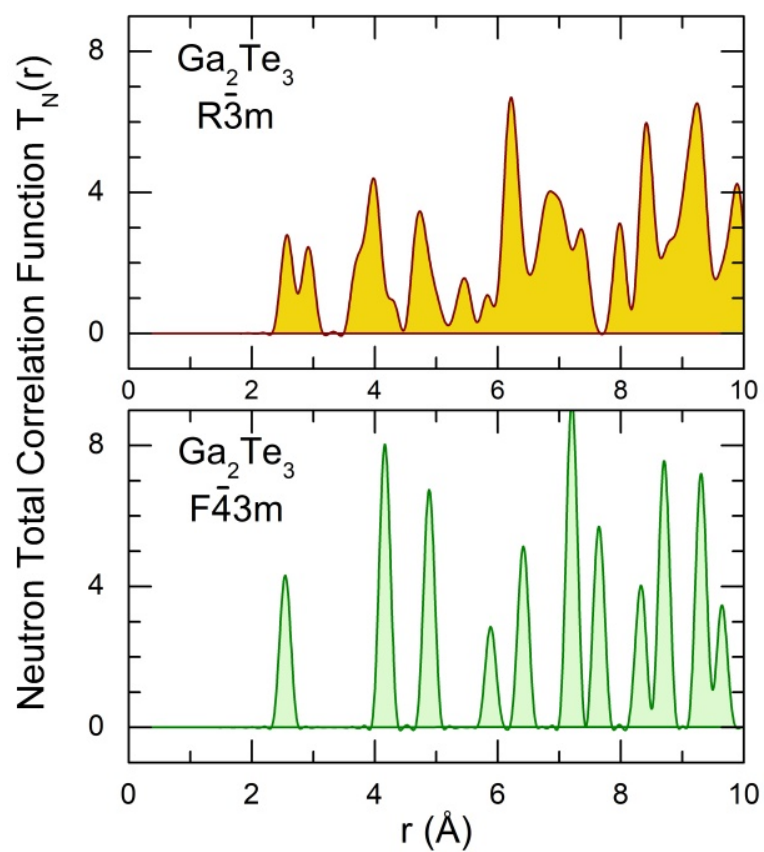

**Fig. S5** Neutron total correlation functions of (a) rhombohedral<sup>S6</sup>  $\text{Ga}_2\text{Te}_3$  and (b) fcc  $\text{Ga}_2\text{Te}_3$ .<sup>S7</sup>



## Structural changes during SET-RESET transitions

Diffraction and Raman experiments supported by DFT and FPMD modeling show that amorphous  $\text{Ga}_2\text{Te}_3$  has essentially the tetrahedral structure with a small population, 2-4%, of incipient nuclei reminiscent of monoclinic HP-Te II and rhombohedral HP- $\text{Ga}_2\text{Te}_3$ . The fraction of these nuclei increases above the glass transition temperature according to FPMD simulations. Very recently, we have carried out neutron diffraction experiments of liquid  $\text{Ga}_2\text{Te}_3$  at 1100 K just above melting, which will be reported elsewhere. The experimental neutron total correlation function  $T_N(r)$  at 1100 K shows important differences compared to real-space functions of amorphous  $\text{Ga}_2\text{Te}_3$ . The local gallium environment remains four-fold coordinated but the tetrahedral distortion appears to be very strong with two clearly different contributions to the Ga-Te nearest neighbor peak, reminiscent of that in rhombohedral HP- $\text{Ga}_2\text{Te}_3$ .

The preliminary FPMD simulations enable the orientational order parameter  $q^{S8,S9}$  to be calculated and determine that the fraction of defect octahedral entities  $\text{GaX}_4$  has increased by a factor of 5, from 3% at 300 K to 15% at 1100 K. Similar situation is expected in supercooled  $\text{Ga}_2\text{Te}_3$  liquid during the SET pulse. Very high viscosity of supercooled liquid and high internal pressure of 4-8 GPa related to nanotectonic compression<sup>S5</sup> will transform the defect octahedral species and under-/over-coordinated species  $\text{GaX}_3$ ,  $\text{GaX}_5$ ,  $\text{GaX}_6$  into crystallites of HP- $\text{Ga}_2\text{Te}_3$  with octahedral gallium coordination. The fraction of under-/over-coordinated species was also found to be increased from  $p_{\text{Ga}\neq 4} \approx 0.04$  (300 K) to  $p_{\text{Ga}\neq 4} \approx 0.21$  (1100 K).

The short RESET pulse transforms  $\text{Ga}_2\text{Te}_3$  into normal liquid above melting with low viscosity and hence without substantial nanotectonic compression. Fast cooling of this normal liquid into amorphous material will retain the 4-fold gallium coordination, and structural relaxation will increase the fraction of tetrahedral species.

This hypothesis will be further verified by FPMD simulations reproducing the SET and RESET pulses.

## Additional references

- S1 J. E. Huheey, E. A. Keiter and R. L. Keiter, *Inorganic Chemistry: Principles of Structure and Reactivity*, 4th ed., Harper-Collins, New York, 1993, pp A-25–A-33.
- S2 M. W. Schmidt, P. N. Truong and M. S. Gordon,  $\pi$ -bond strengths in the second and third periods, *J. Am. Chem. Soc.*, 1987, **109**, 5217–5227.
- S3 L. Pauling, *The Nature of the Chemical Bond*, 3rd ed., Cornell University Press, Ithaca, NY, 1960, p 93.
- S4 A. V. Kiselev, V. A. Mikhalevsky, A. A. Burtsev, V. V. Ionin, N. N. Eliseev, A. A. Lotin, Transmissivity to reflectivity change delay phenomenon observed in GeTe thin films at laser-induced reamorphization, *Optics and Laser Technology*, 2021, **143**, 107305.
- S5 M. Bokova, A. Tverjanovich, C. J. Benmore, D. Fontanari, A. Sokolov, M. Khomenko, M. Kassem, I. Ozheredov, and E. Bychkov, Unraveling the atomic structure of bulk binary Ga–Te glasses with surprising nanotectonic features for phase-change memory applications, *ACS Appl. Mater. Interfaces*, 2021, **13**, 37363–37379.
- S6 N. R. Serebryanaya, The crystal structure of pressure-induced phases of  $\text{In}_2\text{Te}_3$  and  $\text{Ga}_2\text{Te}_3$ , *Powder Diffr.*, 1992, **7**, 99–102.
- S7 M. Guymont, A. Tomas and M. Guittard, The structure of  $\text{Ga}_2\text{Te}_3$ . An X-ray and high-resolution electron microscopy study, *Philos. Mag. A*, 1992, **66**, 133–139.
- S8 P.-L. Chau and A. J. Hardwick, A new order parameter for tetrahedral configurations, *Mol. Phys.*, 1998, **93**, 511–518.
- S9 J. R. Errington and P. G. Debenedetti, Relationship between structural order and the anomalies of liquid water, *Nature*, 2001, **409**, 318–321.
